# Supplementary material for: Modelling the Human Blood–Brain Barrier in Huntington Disease
Source: MDPI journal article supplement (doi:10.3390/ijms23147813), 2022-07-15
Supplement: s1 [file s1]

# Modelling the human blood brain barrier in Huntington Disease.

by

Domenico Vignone<sup>1</sup>, Odalys Gonzalez Paz<sup>1</sup>, Ivan Fini<sup>1</sup>, Antonella Cellucci<sup>1</sup>, Giulio Auciello<sup>1</sup> Maria Rosaria Battista<sup>1</sup>, Isabelle Gloaguen<sup>1</sup>, Silvia Fortuni<sup>1</sup>, Cristina Cariulo<sup>1</sup>, Vinod Khetarpal<sup>2</sup>, Celia Dominguez<sup>2</sup>, Ignacio Muñoz-Sanjuán<sup>2</sup> and Annalise Di Marco<sup>1\*</sup>

<sup>1</sup>IRBM SpA, via Pontina km 30,6; 00071 Pomezia (Rome), Italy

<sup>2</sup>CHDI Management/CHDI Foundation, 6080 Center Drive, Los Angeles, CA 90045, USA

\* To whom correspondence should be addressed: a.dimarco@irbm.com;

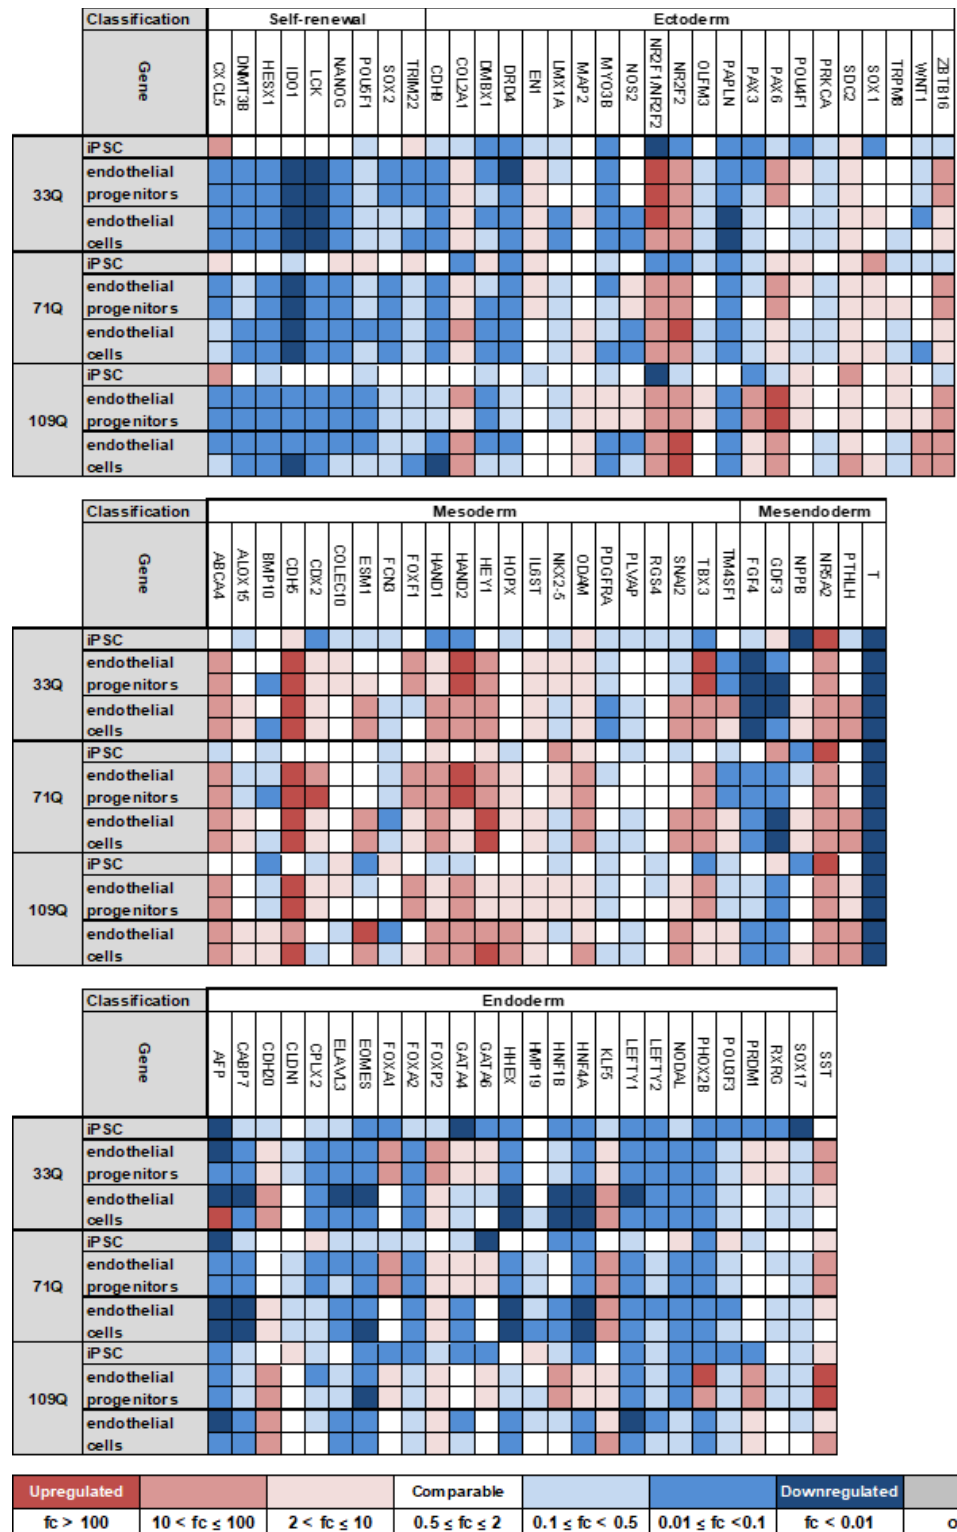

**Figure S1. Characterization of human iPSCs.** The pluripotency of the clones as well as their self-renewal ability were confirmed by pluripotency score card analysis. Colours indicate the fold change in expression relative to the undifferentiated reference set for each gene.

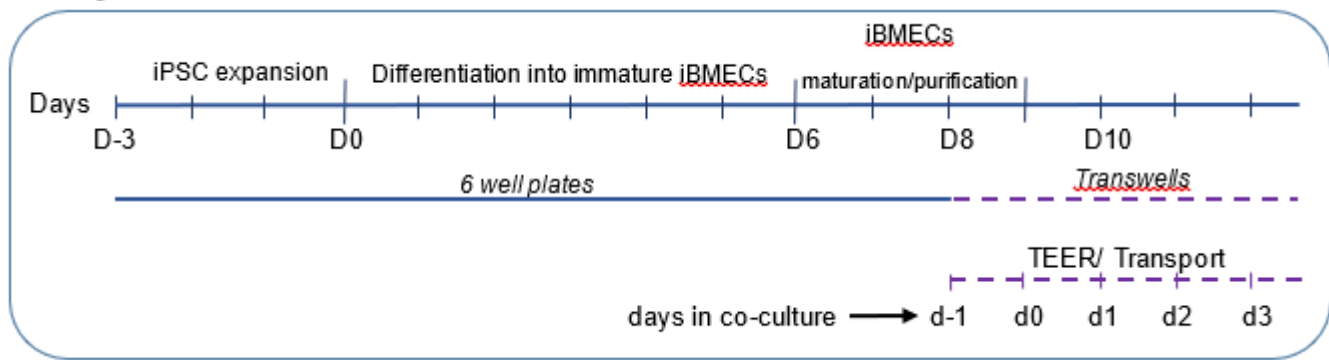

**Figure S2: Generation and selection of iBMECs.** Scheme illustrating the timeline and the cell culture steps.

**Table S1: Differentially expressed genes between HD-iBMECs and healthy iBMEC.** More than 3 fold up-regulated and down-regulated genes (statistical difference using Student's t-test set at  $p < 0.05$ ).

| Gene<br>(in use alias)         | iBMEC_71 vs 33 |                     | iBMEC_109 vs 33 |                     | HD        | Other neurological disorders                                                                              |
|--------------------------------|----------------|---------------------|-----------------|---------------------|-----------|-----------------------------------------------------------------------------------------------------------|
|                                | FC             | Log <sub>2</sub> FC | FC              | Log <sub>2</sub> FC |           |                                                                                                           |
| HLA-C                          | 1548.8         | 10.6                | 1477.0          | 10.5                | -         | -                                                                                                         |
| UNC5D                          | 366.0          | 8.5                 | 1232.1          | 10.3                | [79]      | Psychiatric illness [80]                                                                                  |
| COL22A1                        | 763.4          | 9.6                 | 678.4           | 9.4                 | [81,82]   | Behavioral psychopathologies [83] <sup>a</sup> ; fragile X syndrome [84] <sup>a</sup>                     |
| CTSF                           | 22.4           | 4.5                 | 364.3           | 8.5                 | -         | adult-onset neuronal ceroid lipofuscinosis [85]                                                           |
| SP8                            | 18.5           | 4.2                 | 239.6           | 7.9                 | -         | -                                                                                                         |
| CDH6                           | 7.0            | 2.8                 | 239.4           | 7.9                 | -         | AD [86]                                                                                                   |
| C5orf38                        | 167.7          | 7.4                 | 142.9           | 7.2                 | -         | -                                                                                                         |
| LOC100128252<br>* (ZNF667-AS1) | >39.4          | >5.3                | >5              | >2.3                | -         | Frontotemporal dementia diseases [87]; cerebral ischemia [88] <sup>a</sup>                                |
| KCNQ2                          | 15.3           | 3.9                 | 28.5            | 4.8                 | [89,90]   | Epilepsy [91]; epileptic encephalopathy [92]; Linked to CALM3 in neurological disorders [93] <sup>a</sup> |
| C10orf57<br>(TMEM254)          | 21.5           | 4.4                 | 24.0            | 4.6                 | -         | Linked to STX1A and SYT1 in neurological disorders [93] <sup>a</sup>                                      |
| HIST1H3C                       | 150.2          | 7.2                 | 23.7            | 4.6                 | [94]      | -                                                                                                         |
| ZBTB16                         | 3.5            | 1.8                 | 20.7            | 4.4                 | [95]      | -                                                                                                         |
| IRX2*                          | >19.6          | >4.3                | >15.9           | >4.0                | -         | PD [96]                                                                                                   |
| HLA-A                          | 5.8            | 2.5                 | 17.9            | 4.2                 | [97]      | Neurologicals disorders [98]                                                                              |
| POU5F1                         | 5.5            | 2.4                 | 17.4            | 4.1                 | [99]      | -                                                                                                         |
| GABRB3                         | 6.2            | 2.6                 | 17.3            | 4.1                 | -         | Epileptic encephalopathy [100]; neurodevelopment [101]; Febrile seizure [102]                             |
| NEFL                           | 3.1            | 1.6                 | 15.9            | 4.0                 | [103-106] | Charcot-Marie-Tooth disease [107]; PD [108]                                                               |
| CDH4*                          | >6.3           | 2.7                 | >12.4           | >3.6                | -         | -                                                                                                         |
| GAP43                          | 6.0            | 2.6                 | 11.1            | 3.5                 | -         | AD and PD [109]                                                                                           |
| LIX1                           | 4.7            | 2.2                 | 10.9            | 3.4                 | -         | -                                                                                                         |
| ARSE                           | 5.3            | 2.4                 | 10.1            | 3.3                 | -         | -                                                                                                         |
| PMP22                          | 3.9            | 2.0                 | 7.7             | 2.9                 | -         | Charcot-Marie-Tooth disease [110]                                                                         |
| PCDHA11                        | 3.8            | 1.9                 | 6.9             | 2.8                 | [111]     | Protocadherins in neural circuit formation [112] <sup>a</sup> ; psychosis [113] <sup>a</sup>              |
| DPPA4                          | 3.3            | 1.7                 | 6.9             | 2.8                 | -         | -                                                                                                         |
| THY1                           | 3.7            | 1.9                 | 6.8             | 2.8                 | -         | -                                                                                                         |
| PAX6                           | 3.9            | 2.0                 | 6.6             | 2.7                 | [114]     | Autism [115] <sup>a</sup> ; neurodegeneration [116] <sup>a</sup>                                          |

|                     |      |      |     |      |                                             |                                                                                                                            |
|---------------------|------|------|-----|------|---------------------------------------------|----------------------------------------------------------------------------------------------------------------------------|
| RGL1                | 3.4  | 1.8  | 6.0 | 2.6  | -                                           | -                                                                                                                          |
| DPYSL5              | 3.2  | 1.7  | 5.6 | 2.5  | [79,117]                                    | Age-related [118] <sup>a</sup> ; X-linked brain disease [119]                                                              |
| SOBP                | 4.6  | 2.2  | 5.5 | 2.5  | -                                           | Trisomy 18 [120] <sup>c</sup>                                                                                              |
| EFNA2               | 3.9  | 2.0  | 5.4 | 2.4  | -                                           | PD [121]                                                                                                                   |
| COL9A3              | 5.8  | 2.5  | 4.3 | 2.1  | [122]                                       | Ring chromosome 20 [123]; Behavioral psychopathologies [83]                                                                |
| PCDHB5              | 23.1 | 4.5  | 4.2 | 2.1  | [124] <sup>a</sup>                          | -                                                                                                                          |
| KCTD12              | 3.7  | 1.9  | 3.8 | 1.9  | -                                           | Bipolar I disorder [125]; schizophrenia [126]; depression [127]                                                            |
| CENPM               | 4.1  | 2.0  | 3.7 | 1.9  | -                                           | -                                                                                                                          |
| KIAA0922 (TMEM131L) | 3.5  | 1.8  | 3.6 | 1.9  | -                                           | -                                                                                                                          |
| SEPT3 (SEPTIN3)     | 3.8  | 1.9  | 3.5 | 1.8  | -                                           | AD [128]                                                                                                                   |
| EEF1A2              | 3.1  | 1.6  | 3.4 | 1.8  | [129] ( <i>KO induces HTT aggregation</i> ) | Degenerative epileptic-dyskinetic encephalopathy [130]; epileptic autistic patient [131]                                   |
| CDC45               | 3.1  | 1.6  | 3.2 | 1.7  | -                                           | Schizophrenia [132]                                                                                                        |
|                     |      |      |     |      |                                             |                                                                                                                            |
| ADAMTS5             | 0.3  | -1.8 | 0.3 | -1.8 | [133]                                       | AD [134,135]; Cerebral cavernous malformation [136]                                                                        |
| MXRA5               | 0.3  | -1.6 | 0.3 | -1.9 | -                                           | Heart failure [137]                                                                                                        |
| KCNJ2-AS1           | 0.3  | -1.8 | 0.3 | -1.9 | [138] <sup>a</sup>                          | -                                                                                                                          |
| NAALADL2            | 0.3  | -1.7 | 0.3 | -1.9 | -                                           | -                                                                                                                          |
| CEBPA               | 0.3  | -1.9 | 0.2 | -2.2 | [139,140]                                   | Migraine [141] <sup>c</sup>                                                                                                |
| STAC                | 0.3  | -1.6 | 0.2 | -2.4 | [142]                                       | -                                                                                                                          |
| CDH20               | 0.1  | -2.8 | 0.2 | -2.5 | -                                           | Glioblastoma [143]                                                                                                         |
| WNT9B               | 0.2  | -2.3 | 0.2 | -2.5 | [144,145]                                   | Hunter syndrome [146]<br><a href="https://dx.doi.org/10.3390%2Fijms18051072">https://dx.doi.org/10.3390%2Fijms18051072</a> |
| FAM20A              | 0.2  | -2.1 | 0.2 | -2.6 | -                                           | -                                                                                                                          |
| ST6GALNAC2          | 0.3  | -1.9 | 0.2 | -2.6 | [147]                                       | -                                                                                                                          |
| TNNT3               | 0.2  | -2.2 | 0.2 | -2.6 | [148]                                       | -                                                                                                                          |
| ESRRG               | 0.2  | -2.4 | 0.2 | -2.6 | [148]                                       | Common neurodegenerative hub [149]; AD [150] <sup>c</sup>                                                                  |
| PLAGL1 (Zac1)       | 0.2  | -2.2 | 0.2 | -2.7 | [151] <sup>c</sup>                          | AD [152]                                                                                                                   |
| CA10                | 0.1  | -3.0 | 0.1 | -2.8 | -                                           | Glioma [153]                                                                                                               |
| SLC16A10            | 0.3  | -1.7 | 0.1 | -3.3 | -                                           | -                                                                                                                          |
| SNCG                | 0.2  | -2.4 | 0.1 | -3.6 | -                                           | PD [139,154] <sup>b</sup>                                                                                                  |
| NPR3                | 0.1  | -2.8 | 0.1 | -4.2 | -                                           | AD [155] <sup>a</sup>                                                                                                      |
| MRPS21              | 0.2  | -2.6 | 0.1 | -4.2 | -                                           | -                                                                                                                          |
| DSCR6 (RIPPLY3)     | 0.2  | -2.4 | 0.0 | -4.4 | -                                           | -                                                                                                                          |
| LOC100134868        | 0.3  | -1.6 | 0.0 | -5.8 | -                                           | -                                                                                                                          |

a: not a strong or direct evidence,

b: absence of correlation or discorrelation

c: opposite effect observed

## Table S2: Excel file transcriptome results

Table S2\_selected transcriptome results.xlsx

**Table S3:** The most expressed SLC transporters is reported.

| Gene (protein)    | iBMEC |      |      | FC<br>(iB-<br>MEC_10<br>9 vs 33) | p value<br>(Stu-<br>dent's t-<br>test) | Role                                                                                             | Disease                                                                                                                                                                                                       |
|-------------------|-------|------|------|----------------------------------|----------------------------------------|--------------------------------------------------------------------------------------------------|---------------------------------------------------------------------------------------------------------------------------------------------------------------------------------------------------------------|
|                   | 33Q   | 71Q  | 109Q |                                  |                                        | (IUPHAR)                                                                                         | (Hu. 2020 )                                                                                                                                                                                                   |
| SLC2A3 (GLUT3)    | 3473  | 3504 | 3118 | 0.9                              | 0.246                                  | Brain/neuron glucose transporter                                                                 |                                                                                                                                                                                                               |
| SLC7A5 (LAT1)     | 1210  | 824  | 817  | 0.7                              | 0.132                                  | Large neutral aa subunit                                                                         | Autism secptrum disorder (glioma in rodent)                                                                                                                                                                   |
| SLC25A3 (MPCP)    | 1101  | 776  | 1000 | 0.9                              | 0.234                                  | Mitochondrial phosphate carrier                                                                  | (11 of the- 25 family are linked to brain disorders)                                                                                                                                                          |
| SLC25A6 (ANT3)    | 633   | 582  | 501  | 0.8                              | <b>0.023</b>                           | Mitochondrial adenine nucleotide translocator 3                                                  | (11 of the- 25 family are linked to brain disorders)                                                                                                                                                          |
| SLC2A1 (GLUT1)    | 588   | 360  | 491  | 0.8                              | 0.168                                  | Erythrocyte /brain glucose transporter                                                           | Glucose transport type 1 deficiency syndrome. intractable infantile seizure. complex motor disorder. intellectual impairment. hypoglycorrhachia. microcephaly. (epilepsy and metabolic dysfunction in redent) |
| SLC44A2 (CTL2)    | 454   | 374  | 349  | 0.8                              | <b>0.005</b>                           | Choline transporter-like 2                                                                       |                                                                                                                                                                                                               |
| SLC25A5 (ANT2)    | 412   | 467  | 425  | 1.0                              | 0.729                                  | Mitochondrial adenine nucleotide translocator 2                                                  | Intellectual disability                                                                                                                                                                                       |
| NPC2              | 386   | 321  | 318  | 0.8                              | <b>0.014</b>                           | NPC intracellular cholesterol transporter 2                                                      | Niemann-Pick disease, type C                                                                                                                                                                                  |
| SLC39A1 (ZIP1)    | 311   | 273  | 253  | 0.8                              | 0.082                                  | Zinc transporrter-1                                                                              |                                                                                                                                                                                                               |
| SLC38A2 (SNAT2)   | 294   | 310  | 286  | 1.0                              | 0.840                                  | Amino acid transporter 2                                                                         |                                                                                                                                                                                                               |
| SLC39A7 (RING5)   | 279   | 202  | 224  | 0.8                              | 0.096                                  | Zinc transporrter-7                                                                              |                                                                                                                                                                                                               |
| SLC3A2 (4F2hc)    | 264   | 265  | 249  | 0.9                              | 0.153                                  | Heterodimerize with SLC7 family members (dibasic and neutral aa)                                 |                                                                                                                                                                                                               |
| SLC25A8 (UCP2)    | 258   | 208  | 123  | 0.5                              | <b>0.003</b>                           | mitochondrial uncoupling protein 2                                                               |                                                                                                                                                                                                               |
| SLC16A1 (MCT1)    | 233   | 327  | 333  | 1.4                              | 0.103                                  | Transport of the product of cellular metabolism                                                  |                                                                                                                                                                                                               |
| SLC25A1 (CIC)     | 222   | 197  | 214  | 1.0                              | 0.709                                  | Mitochondrial citrate transporter                                                                |                                                                                                                                                                                                               |
| SLC5A6 (SMVT)     | 190   | 207  | 195  | 1.0                              | 0.740                                  | Multivitamin transporter (apical membrane enterocytes and colonocytes (biotin. pantothenic acid) |                                                                                                                                                                                                               |
| SLC25A39 (CIG69)  | 189   | 149  | 174  | 0.9                              | 0.521                                  | Mitochondrial aa transporter subfamily                                                           | Childhood absence epilepsy                                                                                                                                                                                    |
| SLC35A4 (MGC2541) | 184   | 179  | 167  | 0.9                              | 0.465                                  | For nucleotide-conjugated sugars within Golgi for glycoprotein formation                         |                                                                                                                                                                                                               |
| SLC16A10 (TAT1)   | 178   | 56   | 18   | 0.1                              | <b>0.001</b>                           | Aromatic aa (tryptophane. phenylalanine. tyrosine. L-DOPA)                                       |                                                                                                                                                                                                               |
| SLC9A3R1          | 168   | 128  | 174  | 1.0                              | 0.829                                  | (SLC9A3: sodium hydrogen exchanger)                                                              |                                                                                                                                                                                                               |
| SLC6A1 (TMEM165)  | 166   | 135  | 131  | 0.8                              | <b>0.032</b>                           | Golgi Ca <sup>2+</sup> /H <sup>+</sup> exchangers                                                |                                                                                                                                                                                                               |

|                   |     |     |     |     |       |                                                                                                                |                               |
|-------------------|-----|-----|-----|-----|-------|----------------------------------------------------------------------------------------------------------------|-------------------------------|
| SLC56A1 (SFXN1)   | 148 | 147 | 140 | 0.9 | 0.663 | Mitochondrial serine transporter                                                                               |                               |
| SLC25A50 (MTCH2)  | 141 | 139 | 135 | 1.0 | 0.557 | Mitochondrial Carrier 2                                                                                        |                               |
| SLC53A1 (XPR1)    | 133 | 136 | 108 | 0.8 | 0.163 | Xenotropic And Poly-tropic Retrovirus Receptor 1                                                               | Brain calcification           |
| SLC2A4RG          | 129 | 113 | 105 | 0.8 | 0.020 | (SLC2A4: insulin-responsive glucose transporter. GLUT4)                                                        |                               |
| SLC58A2 (TUSC3)   | 129 | 121 | 128 | 1.0 | 0.951 | Tumor Suppressor Candidate 3                                                                                   |                               |
| SLC11A2 (DMT1)    | 113 | 64  | 66  | 0.6 | 0.020 | Divalent cations across endosomal membranes                                                                    | Parkinson's disease in rodent |
| SLC25A23 (APC2)   | 105 | 112 | 99  | 0.9 | 0.616 | Mitochondrial phosphate carrier 2                                                                              |                               |
| SLC35B1 (UGTREL1) | 103 | 92  | 91  | 0.9 | 0.264 | Galactose transporter                                                                                          |                               |
| SLC1A5 (ASCT2)    | 99  | 115 | 138 | 1.4 | 0.012 | Neutral aa transporter (alanine, serine, cysteine) (unlike EAATs same SLC1 family, donot counter transport K+) | Schizophrenia in rodents      |
| SLC54A2 (MPC2)    | 96  | 96  | 95  | 1.0 | 0.931 | Mitochondrial Pyruvate Carrier 2                                                                               |                               |
| SLC7A1 (CAT1)     | 96  | 99  | 115 | 1.2 | 0.046 | Y+ basic aa (arginine, lysine, histidine, ornithine)                                                           |                               |
| SLC66A5 (MPDU1)   | 94  | 79  | 65  | 0.7 | 0.011 | Mannose-P-Dolichol Utilization Defect 1                                                                        |                               |
| SLC25A4 (ANT1)    | 92  | 102 | 94  | 1.0 | 0.684 | Mitochondrial adenine nucleotide translocator 1                                                                | Bipolar disorder in rodent    |

**Table S4: *In vitro-in vivo* correlation.** Table showing values used for correlation shown in **Figure 9** and references for *in vivo*  $K_{p,uu,CSF}$ .

| Compound      | Human $K_{p,uu,CSF}$ | References |
|---------------|----------------------|------------|
| arginine      | 0.28                 | [156]      |
| atenolol      | 0.18                 | [157]      |
| bupropion     | 1.11                 | [158]      |
| caffeine      | 1.00                 | [159]      |
| carbamazepine | 0.24                 | [160]      |
| citalopram    | 1.77                 | [161]      |
| digoxin       | 0.31                 | [162]      |
| gabapentin    | 0.16                 | [157]      |
| glucose       | 0.65                 | [161]      |
| IgG (MEM189)  | 0.002                | [161]      |
| indomethacin  | 0.27                 | [157]      |
| KYNA          | 0.024                | [164]      |
| L-DOPA        | 0.49                 | [158]      |
| leucine       | 0.12                 | [156]      |
| methotrexate  | 0.02                 | [165]      |
| phenylalanine | 0.28                 | [156]      |
| phenytoin     | 0.19                 | [166]      |
| propranolol   | 0.42                 | [157]      |
| verapamil     | 1.13                 | [157]      |

**Table S5: Antibodies used in this study.**

| Target epitope                                        | Species          | Type       | Label                | RRID*      | Vendor        | Cat n           | Dilution                      |
|-------------------------------------------------------|------------------|------------|----------------------|------------|---------------|-----------------|-------------------------------|
| Claudin-5                                             | rabbit           | polyclonal |                      | AB_2533157 | Thermo Fisher | 34-1600         | 1:25                          |
| Claudin-1                                             | rabbit           | polyclonal |                      | AB_2533977 | Thermo Fisher | 71-500          | 1:25                          |
| Actin                                                 | mouse            | monoclonal |                      | AB_2533147 | Thermo Fisher | 33-9100         | 1:200                         |
| ACE2                                                  | rabbit           | polyclonal |                      |            | Abcam         | Ab15384         | 1:500                         |
| LDLR                                                  | rabbit           | polyclonal |                      |            | Abcam         | Ab133127        | 1:1000                        |
| EGFR                                                  | rabbit           | monoclonal |                      |            | Abcam         | Ab52894         | 1:1000                        |
| LRP1                                                  | rabbit           | polyclonal |                      |            | Origene       | AP21130PU-N     | 1:500                         |
| HAP1                                                  | mouse            | monoclonal |                      |            | Origene       | TA309681        | 1:500                         |
| TFR1                                                  | rabbit           | polyclonal |                      |            | Origene       | TA324761        | 1:1000                        |
| Human Oct-4A                                          | mouse IgG2A      | monoclonal |                      |            | ReD System    | MAB17591        | 10 µl x 10 <sup>6</sup> cells |
| Human Von Willebrand Factor                           | rabbit           | polyclonal |                      | AB_2315602 | Dako/Agilent  | A008202-5       | 1:100                         |
| Von Willebrand Factor                                 | mouse IgG1 Kappa | monoclonal | Alexa Fluor 488      |            | Novusbio      | NBP2-34510AF488 | 5µL x 10 <sup>6</sup> cells   |
| Isotype Control APC-conjugated Antibody Clone # 20102 | mouse IgG2A      | monoclonal |                      |            | ReD System    | IC003A          | 10µl x 10 <sup>6</sup> cells  |
| Isotype Control (11711)                               | mouse IgG1       |            | Alexa Fluor 488      |            | ReD System    | IC002G          | 5µL x 10 <sup>6</sup> cells   |
| ZO1 tight junction protein                            | mouse            | monoclonal |                      | AB_2533147 | Thermo Fisher | 339100          | 1:100                         |
| CD31/PECAM-1                                          | rabbit           | polyclonal |                      |            | Thermo Fisher | RB-10333-P1     | 1:25 MEOH                     |
| LDLR                                                  | rabbit           | polyclonal |                      |            | Invitrogen    | PA5-22976       | 1:1000                        |
| Anti-rabbit IgG (H+L) Highly Cross-Adsorbed           | goat             | polyclonal | Alexa Fluor 488      | AB_2576217 | Thermo Fisher | A-11034         | 1:3000                        |
| Anti-rabbit IgG (H+L) Highly Cross-Adsorbed           | goat             | polyclonal | Alexa Fluor 594      | AB_2534095 | Thermo Fisher | A-11037         | 1:3000                        |
| Anti-Mouse IgG (H+L) Highly Cross-Adsorbed            | goat             | polyclonal | Alexa Fluor Plus 488 | AB_2633275 | Thermo Fisher | A32723          | 1:3000                        |
| Anti-Mouse IgG (H+L) Highly Cross-Adsorbed            | goat             | polyclonal | Alexa Fluor Plus 594 | AB_2534091 | Thermo Fisher | A-11032         | 1:3000                        |

\*: Research resource identifier.

## References

79. Ring, K.L.; An, M.C.; Zhang, N.; O'Brien, R.N.; Ramos, E.M.; Gao, F.; Atwood, R.; Bailus, B.J.; Melov, S.; Mooney, S.D.; et al. Genomic Analysis Reveals Disruption of Striatal Neuronal Development and Therapeutic Targets in Human Huntington's Disease Neural Stem Cells. *Stem Cell Rep.* **2015**, *5*, 1023–1038, <https://doi.org/10.1016/j.stemcr.2015.11.005>.
80. Srikanth, P.; Lagomarsino, V.N.; Pearse, R.; Liao, M.; Ghosh, S.; Nehme, R.; Seyfried, N.; Eggan, K.; Young-Pearse, T.L. Convergence of independent DISC1 mutations on impaired neurite growth via decreased UNC5D expression. *Transl. Psychiatry* **2018**, *8*, 245, <https://doi.org/10.1038/s41398-018-0281-9>.
81. Agus, F.; Crespo, D.; Myers, R.H.; Labadorf, A. The caudate nucleus undergoes dramatic and unique transcriptional changes in human prodromal Huntington's disease brain. *BMC Med Genom.* **2019**, *12*, 1–17, <https://doi.org/10.1186/s12920-019-0581-9>.
82. Mehta, S.R.; Tom, C.M.; Wang, Y.; Bresee, C.; Rushton, D.; Mathkar, P.P.; Tang, J.; Mattis, V.B. Human Huntington's Disease iPSC-Derived Cortical Neurons Display Altered Transcriptomics, Morphology, and Maturation. *Cell Rep.* **2018**, *25*, 1081–1096.e6, <https://doi.org/10.1016/j.celrep.2018.09.076>.
83. Smagin, D.; Galyamina, A.G.; Kovalenko, I.L.; Babenko, V.; Kudryavtseva, N.N. Aberrant Expression of Collagen Gene Family in the Brain Regions of Male Mice with Behavioral Psychopathologies Induced by Chronic Agonistic Interactions. *BioMed Res. Int.* **2019**, *2019*, 1–13, <https://doi.org/10.1155/2019/7276389>.
84. Boland, M.J.; Nator, K.L.; Tran, H.T.; Szücs, A.; Lynch, C.L.; Paredes, R.; Tassone, F.; Sanna, P.P.; Hagerman, R.J.; Loring, J.F. Molecular analyses of neurogenic defects in a human pluripotent stem cell model of fragile X syndrome. *Brain* **2017**, *140*, 582–598, <https://doi.org/10.1093/brain/aww357>.
85. van der Zee, J.; Mariën, P.; Crols, R.; Van Mossevelde, S.; Dillen, L.; Perrone, F.; Engelborghs, S.; Verhoeven, J.; D'Aes, T.; Groote, C.C.-D.; et al. Mutated CTSF in adult-onset neuronal ceroid lipofuscinosis and FTD. *Neurol. Genet.* **2016**, *2*, e102, <https://doi.org/10.1212/nxg.0000000000000102>.
86. Ahmad, S.; Milan, M.D.C.; Hansson, O.; Demirkan, A.; Agustin, R.; Sáez, M.E.; Giagtzoglou, N.; Cabrera-Socorro, A.; Bakker, M.H.M.; Ramirez, A.; et al. CDH6 and HAGH protein levels in plasma associate with Alzheimer's disease in APOE ε4 carriers. *Sci. Rep.* **2020**, *10*, 1–13, <https://doi.org/10.1038/s41598-020-65038-5>.
87. Ehrlich, M.; Hallmann, A.-L.; Reinhardt, P.; Araúzo-Bravo, M.J.; Korr, S.; Röpké, A.; Psathaki, O.E.; Ehling, P.; Meuth, S.G.; Oblak, A.L.; et al. Distinct Neurodegenerative Changes in an Induced Pluripotent Stem Cell Model of Frontotemporal Dementia Linked to Mutant TAU Protein. *Stem Cell Rep.* **2015**, *5*, 83–96, <https://doi.org/10.1016/j.stemcr.2015.06.001>.
88. Yuan, D.; Huang, J.; Yuan, X.; Zhao, J.; Jiang, W. Zinc finger protein 667 expression is upregulated by cerebral ischemic preconditioning and protects cells from oxidative stress. *Biomed. Rep.* **2013**, *1*, 534–538, <https://doi.org/10.3892/br.2013.124>.

89. Cao, Y.; Bartolomé-Martín, D.; Rotem, N.; Rozas, C.; Dellal, S.S.; Chacon, M.A.; Kadriu, B.; Gulinello, M.; Khodakhah, K.; Faber, D.S. Rescue of homeostatic regulation of striatal excitability and locomotor activity in a mouse model of Huntington's disease. *Proc. Natl. Acad. Sci.* **2015**, *112*, 2239–2244, <https://doi.org/10.1073/pnas.1405748112>.
90. Mucha, M.; Ooi, L.; Linley, J.E.; Mordaka, P.; Dalle, C.; Robertson, B.; Gamper, N.; Wood, I.C. Transcriptional Control of KCNQ Channel Genes and the Regulation of Neuronal Excitability. *J. Neurosci.* **2010**, *30*, 13235–13245, <https://doi.org/10.1523/JNEUROSCI.1981-10.2010>.
91. Amadori, E.; Brolatti, N.; Scala, M.; Marchese, F.; Vari, M.S.; Ramenghi, L.A.; Madia, F.; Minetti, C.; Striano, P. Precision medicine in early-onset epilepsy: The KCNQ2 paradigm. *J. Transl. Genet. Genom.* **2020**, <https://doi.org/10.20517/jtgg.2020.36>.
92. Weckhuysen, S.; Ivanovic, V.; Hendrickx, R.; Van Coster, R.; Hjalgrim, H.; Møller, R.S.; Grønberg, S.; Schoonjans, A.-S.; Ceulemans, B.; Heavin, S.B.; et al. Extending the KCNQ2 encephalopathy spectrum: Clinical and neuroimaging findings in 17 patients. *Neurology* **2013**, *81*, 1697–1703, <https://doi.org/10.1212/01.wnl.0000435296.72400.a1>.
93. Zhang, Y.; Zhao, Y.; Song, X.; Luo, H.; Sun, J.; Han, C.; Gu, X.; Li, J.; Cai, G.; Zhu, Y.; et al. Modulation of Stem Cells as Therapeutics for Severe Mental Disorders and Cognitive Impairments. *Front. Psychiatry* **2020**, *11*, <https://doi.org/10.3389/fpsy.2020.00080>.
94. Świtońska, K.; Szlachcic, W.J.; Handschuh, L.; Wojciechowski, P.; Marczak, J.; Stelmaszczyk, M.; Figlerowicz, M.; Figiel, M. Identification of Altered Developmental Pathways in Human Juvenile HD iPSC With 71Q and 109Q Using Transcriptome Profiling. *Front. Cell. Neurosci.* **2019**, *12*, <https://doi.org/10.3389/fncel.2018.00528>.
95. Zhang, T.; Dong, K.; Liang, W.; Xu, D.; Xia, H.; Geng, J.; Najafov, A.; Liu, M.; Li, Y.; Han, X.; et al. G-protein-coupled receptors regulate autophagy by ZBTB16-mediated ubiquitination and proteasomal degradation of Atg14L. *eLife* **2015**, *4*, e06734–e06734, <https://doi.org/10.7554/elife.06734>.
96. Sim, H.; Lee, J.-E.; Yoo, H.M.; Cho, S.; Lee, H.; Baek, A.; Kim, J.; Seo, H.; Kweon, M.-N.; Kim, H.G.; et al. Iroquois Homeobox Protein 2 Identified as a Potential Biomarker for Parkinson's Disease. *Int. J. Mol. Sci.* **2020**, *21*, 3455, <https://doi.org/10.3390/ijms21103455>.
97. Madsen, H.; Nielsen, L.S.; A Sorensen, S. An association study of Huntington's disease and HLA. *J. Med. Genet.* **1982**, *19*, 452–454, <https://doi.org/10.1136/jmg.19.6.452>.
98. Misra, M.; Damotte, V.; Hollenbach, J.A. The immunogenetics of neurological disease. *Immunology* **2017**, *153*, 399–414, <https://doi.org/10.1111/imm.12869>.
99. Smith-Geater, C.; Hernandez, S.J.; Lim, R.; Adam, M.; Wu, J.; Stocksdales, J.T.; Wassie, B.T.; Gold, M.P.; Wang, K.Q.; Miramontes, R.; et al. Aberrant Development Corrected in Adult-Onset Huntington's Disease iPSC-Derived Neuronal Cultures via WNT Signaling Modulation. *Stem Cell Rep.* **2020**, *14*, 406–419, <https://doi.org/10.1016/j.stemcr.2020.01.015>.
100. Papandreou, A.; McTague, A.; Trump, N.; Ambegaonkar, G.; Ngoh, A.; Meyer, E.; Scott, R.H.; A Kurian, M. GABRB3 mutations: A new and emerging cause of early infantile epileptic encephalopathy. *Dev. Med. Child Neurol.* **2015**, *58*, 416–420, <https://doi.org/10.1111/dmcn.12976>.
101. Tanaka, M.; DeLorey, T.M.; Delgado-Escueta, A.V.; Olsen, R.W. GABRB3, Epilepsy, and Neurodevelopment. **2012**, 887–899, <https://doi.org/10.1093/med/9780199746545.003.0070>.
102. Møller, R.S.; Wuttke, T.V.; Helbig, I.; Marini, C.; Johannesen, K.M.; Brilstra, E.H.; Vaher, U.; Borggraefe, I.; Talvik, I.; Talvik, T.; et al. Mutations in GABRB3. *Neurology* **2017**, *88*, 483–492, <https://doi.org/10.1212/wnl.0000000000003565>.
103. Byrne, L.M.; Rodrigues, F.B.; Blennow, K.; Durr, A.; Leavitt, B.R.; Roos, R.A.C.; I Scahill, R.; Tabrizi, S.J.; Zetterberg, H.; Langbehn, D.; et al. Neurofilament light protein in blood as a potential biomarker of neurodegeneration in Huntington's disease: A retrospective cohort analysis. *Lancet Neurol.* **2017**, *16*, 601–609, [https://doi.org/10.1016/s1474-4422\(17\)30124-2](https://doi.org/10.1016/s1474-4422(17)30124-2).
104. Johnson, E.B.; Byrne, L.M.; Gregory, S.; Rodrigues, F.B.; Blennow, K.; Durr, A.; Leavitt, B.; Roos, R.A.; Zetterberg, H.; Tabrizi, S.J.; et al. Neurofilament light protein in blood predicts regional atrophy in Huntington disease. *Neurology* **2018**, *90*, e717–e723, <https://doi.org/10.1212/wnl.0000000000005005>.
105. Rodrigues, F.B.; Byrne, L.M.; Tortelli, R.; Johnson, E.B.; Wijeratne, P.A.; Arridge, M.; de Vita, E.; Ghazaleh, N.; Houghton, R.; Furby, H.; Alexander, D.C.; Tabrizi, S.J.; Schobel, S.; Scahill, R.I.; Heslegrave, A.; Zetterberg, H.; & Wild, E.J. (2020). Longitudinal dynamics of mutant huntingtin and neurofilament light in Huntington's disease: The prospective HD-CSF study. In medRxiv. <https://doi.org/10.1101/2020.03.31.20045260>.
106. Soylu-Kucharz, R.; Sandelius, J.; Sjögren, M.; Blennow, K.; Wild, E.J.; Zetterberg, H.; Björkqvist, M. Neurofilament light protein in CSF and blood is associated with neurodegeneration and disease severity in Huntington's disease R6/2 mice. *Sci. Rep.* **2017**, *7*, 1–8, <https://doi.org/10.1038/s41598-017-14179-1>.
107. Jordanova, A.; De Jonghe, P.; Boerkoel, C.F.; Takashima, H.; De Vriendt, E.; Ceuterick, C.; Martin, J.-J.; Butler, I.J.; Mancias, P.; Ch Papasozomenos, S.; et al. Mutations in the neurofilament light chain gene (NEFL) cause early onset severe Charcot-Marie-Tooth disease. *Brain* **2003**, *126*, 590–597, <https://doi.org/10.1093/brain/awg059>.
108. Bäckström, D.; Linder, J.; Mo, S.J.; Riklund, K.; Zetterberg, H.; Blennow, K.; Forsgren, L.; Lenfeldt, N. NfL as a biomarker for neurodegeneration and survival in Parkinson disease. *Neurology* **2020**, *95*, e827–e838, <https://doi.org/10.1212/wnl.0000000000010084>.
109. Chung, D.; Shum, A.; Caraveo, G. GAP-43 and BASP1 in Axon Regeneration: Implications for the Treatment of Neurodegenerative Diseases. *Front. Cell Dev. Biol.* **2020**, *8*, <https://doi.org/10.3389/fcell.2020.567537>.
110. Boutary, S.; Echaniz-Laguna, A.; Adams, D.; Loisel-Duwater, J.; Schumacher, M.; Massaad, C.; Massaad-Massade, L. Treating PMP22 gene duplication-related Charcot-Marie-Tooth disease: The past, the present and the future. *Transl. Res.* **2020**, *227*, 100–111, <https://doi.org/10.1016/j.trsl.2020.07.006>.



111. Langfelder, P.; Cantle, J.P.; Chatzopoulou, D.; Wang, N.; Gao, F.; Al-Ramahi, I.; Lu, X.-H.; Ramos, E.M.; El-Zein, K.; Zhao, Y.; et al. Integrated genomics and proteomics define huntingtin CAG length-dependent networks in mice. *Nat. Neurosci.* **2016**, *19*, 623–633, <https://doi.org/10.1038/nn.4256>.
112. Peek, S.L.; Mah, K.M.; Weiner, J.A. Regulation of neural circuit formation by protocadherins. *Experientia* **2017**, *74*, 4133–4157, <https://doi.org/10.1007/s00018-017-2572-3>.
113. Melka, M.G.; A Castellani, C.; Rajakumar, N.; O'Reilly, R.; Singh, S.M. Olanzapine-induced methylation alters cadherin gene families and associated pathways implicated in psychosis. *BMC Neurosci.* **2014**, *15*, 112, <https://doi.org/10.1186/1471-2202-15-112>.
114. Ament, S.; Pearl, J.R.; Cantle, J.P.; Bragg, R.M.; Skene, P.J.; Coffey, S.R.; E Bergey, D.; Wheeler, V.C.; E MacDonald, M.; Baliga, N.S.; et al. Transcriptional regulatory networks underlying gene expression changes in Huntington's disease. *Mol. Syst. Biol.* **2018**, *14*, e7435, <https://doi.org/10.15252/msb.20167435>.
115. Kikkawa, T.; Casingal, C.; Chun, S.H.; Shinohara, H.; Hiraoka, K.; Osumi, N. The role of Pax6 in brain development and its impact on pathogenesis of autism spectrum disorder. *Brain Res.* **2018**, *1705*, 95–103, <https://doi.org/10.1016/j.brainres.2018.02.041>.
116. Mishra, S.; Maurya, S.; Srivastava, K.; Shukla, S.; Mishra, R. Pax6 influences expression patterns of genes involved in neurodegeneration. *Ann. Neurosci.* **2015**, *22*, 226–231, <https://doi.org/10.5214/ans.0972.7531.220407>.
117. Chandrasekaran, S.; Bonchev, D. Network analysis of human post-mortem microarrays reveals novel genes, microRNAs, and mechanistic scenarios of potential importance in fighting huntington's disease. *Comput. Struct. Biotechnol. J.* **2016**, *14*, 117–130, <https://doi.org/10.1016/j.csbj.2016.02.001>.
118. Breen, M.S.; Ozcan, S.; Ramsey, J.M.; Wang, Z.; Ma'Ayan, A.; Rustogi, N.; Gottschalk, M.G.; Webster, M.J.; Weickert, C.S.; Buxbaum, J.D.; et al. Temporal proteomic profiling of postnatal human cortical development. *Transl. Psychiatry* **2018**, *8*, 267, <https://doi.org/10.1038/s41398-018-0306-4>.
119. Laumonnier, F.; Cuthbert, P.C.; Grant, S.G. The Role of Neuronal Complexes in Human X-Linked Brain Diseases. *Am. J. Hum. Genet.* **2007**, *80*, 205–220, <https://doi.org/10.1086/511441>.
120. Hui, L.; Slonim, D.; Wick, H.C.; Johnson, K.L.; Koide, K.; Bianchi, D.W. Novel neurodevelopmental information revealed in amniotic fluid supernatant transcripts from fetuses with trisomies 18 and 21. *Qual. Life Res.* **2012**, *131*, 1751–1759, <https://doi.org/10.1007/s00439-012-1195-x>.
121. Marsh, A.G.; Cottrell, M.T.; Goldman, M.F. Epigenetic DNA Methylation Profiling with MSRE: A Quantitative NGS Approach Using a Parkinson's Disease Test Case. *Front. Genet.* **2016**, *7*, 191, <https://doi.org/10.3389/fgene.2016.00191>.
122. Kumar, A.; Zhang, J.; Tallaksen-Greene, S.; Crowley, M.R.; Crossman, D.; Morton, A.J.; Van Groen, T.; Kadish, I.; Albin, R.L.; Lesort, M.; et al. Allelic series of Huntington's disease knock-in mice reveals expression discorrelates. *Hum. Mol. Genet.* **2016**, *25*, 1619–1636, <https://doi.org/10.1093/hmg/ddw040>.
123. Corrêa, T.; Venâncio, A.C.; Galera, M.F.; Riegel, M. Candidate Genes Associated with Delayed Neuropsychomotor Development and Seizures in a Patient with Ring Chromosome 20.. *Case Rep. Genet.* **2020**, *2020*, 5957415–6, <https://doi.org/10.1155/2020/5957415>.
124. Qureshi, I.A.; Gokhan, S.; Mehler, M.F. REST and CoREST are transcriptional and epigenetic regulators of seminal neural fate decisions. *Cell Cycle* **2010**, *9*, 4477–4486, <https://doi.org/10.4161/cc.9.22.13973>.
125. Lee, M.T.M.; Chen, C.H.; Lee, C.S.; Chong, M.Y.; Ouyang, W.C.; Chiu, N.Y.; Chuo, L.J.; Tan, H.K.L.; Lane, H.Y.; Chang, T.J.; et al. Genome-wide association study of bipolar I disorder in the Han Chinese population. *Mol. Psychiatry* **2010**, *16*, 548–556, <https://doi.org/10.1038/mp.2010.43>.
126. Benes, F.M. Amygdalocortical Circuitry in Schizophrenia: From Circuits to Molecules. *Neuropsychopharmacology* **2009**, *35*, 239–257, <https://doi.org/10.1038/npp.2009.116>.
127. Sibille, E.; Wang, Y.; Joeyen-Waldorf, J.; Gaiteri, C.; Surget, A.; Oh, S.; Belzung, C.; Tseng, G.C.; Lewis, D. A Molecular Signature of Depression in the Amygdala. *Am. J. Psychiatry* **2009**, *166*, 1011–1024, <https://doi.org/10.1176/appi.ajp.2009.08121760>.
128. Takehashi, M.; Alioto, T.; Stedeford, T.; Persad, A.S.; Banasik, M.; Masliah, E.; Tanaka, S.; Ueda, K. Septin 3 Gene Polymorphism in Alzheimer's Disease. *Gene Expr.* **2003**, *11*, 263–270, <https://doi.org/10.3727/000000003783992243>.
129. Teuling, E.; Bourgonje, A.; Veenje, S.; Thijssen, K.; De Boer, J.; Van Der Velde, J.; Swertz, M.; Nollen, E. Modifiers of mutant huntingtin aggregationfunctional conservation of C. elegans-modifiers of polyglutamine aggregation. *PLoS Curr.* **2011**, *3*, RRN1255, <https://doi.org/10.1371/currents.rrn1255>.
130. Carvill, G.L.; Helbig, K.L.; Myers, C.T.; Scala, M.; Huether, R.; Lewis, S.; Kruer, T.N.; Guida, B.S.; Bakhtiari, S.; Sebe, J.; et al. Damaging de novo missense variants inEEF1A2lead to a developmental and degenerative epileptic-dyskinetic encephalopathy. *Hum. Mutat.* **2020**, *41*, 1263–1279, <https://doi.org/10.1002/humu.24015>.
131. Lance, E.; Kronenbuerger, M.; Cohen, J.S.; Furmanski, O.; Singer, H.S.; Fatemi, A. Successful treatment of choreo-athetotic movements in a patient with an EEF1A2 gene variant. *SAGE Open Med Case Rep.* **2018**, *6*, <https://doi.org/10.1177/2050313x18807622>.
132. Lin, M.; Pedrosa, E.; Hrabovsky, A.; Chen, J.; Puliafito, B.R.; Gilbert, S.R.; Zheng, D.; Lachman, H.M. Integrative transcriptome network analysis of iPSC-derived neurons from schizophrenia and schizoaffective disorder patients with 22q11.2 deletion. *BMC Syst. Biol.* **2016**, *10*, 1–20, <https://doi.org/10.1186/s12918-016-0366-0>.
133. Dong, X.; Cong, S. Identification of differentially expressed genes and regulatory relationships in Huntington's disease by bioinformatics analysis. *Mol. Med. Rep.* **2018**, *17*, 4317–4326, <https://doi.org/10.3892/mmr.2018.8410>.
134. Manap, A.S.A.; Madhavan, P.; Vijayabalan, S.; Chia, A.; Fukui, K. Explicating anti-amyloidogenic role of curcumin and piperine via amyloid beta (A $\beta$ ) explicit pathway: Recovery and reversal paradigm effects. *PeerJ* **2020**, *8*, e10003, <https://doi.org/10.7717/peerj.10003>.

135. Pehlivan, S.; Fedakar, R.; Eren, B.; Akyol, S.; Eren, F.; Inanir, N.T.; Gurses, M.S.; Ural, M.N.; Tagil, S.M.; Demircan, K. ADAMTS4, 5, 9, and 15 Expressions in the Autopsied Brain of Patients with Alzheimer's Disease: A Preliminary Immunohistochemistry Study. *2016*, *26*, 7–14, <https://doi.org/10.5455/bcp.20150706034008>.
136. Hong, C.C.; Tang, A.T.; Dettler, M.R.; Choi, J.P.; Wang, R.; Yang, X.; Guerrero, A.A.; Wittig, C.F.; Hobson, N.; Girard, R.; et al. Cerebral cavernous malformations are driven by ADAMTS5 proteolysis of versican. *J. Exp. Med.* **2020**, *217*, <https://doi.org/10.1084/jem.20200140>.
137. Zhou, J.; Zhang, W.; Wei, C.; Zhang, Z.; Yi, D.; Peng, X.; Peng, J.; Yin, R.; Zheng, Z.; Qi, H.; et al. Weighted correlation network bioinformatics uncovers a key molecular biosignature driving the left-sided heart failure. *BMC Med Genom.* **2020**, *13*, 1–13, <https://doi.org/10.1186/s12920-020-00750-9>.
138. Waters, C.W.; Varuzhanyan, G.; Talmadge, R.J.; Voss, A.A. Huntington disease skeletal muscle is hyperexcitable owing to chloride and potassium channel dysfunction. *Proc. Natl. Acad. Sci.* **2013**, *110*, 9160–9165, <https://doi.org/10.1073/pnas.1220068110>.
139. Chandrasekaran, S.; Bonchev, D. A NETWORK VIEW ON PARKINSON'S DISEASE. *Comput. Struct. Biotechnol. J.* **2013**, *7*, e201304004, <https://doi.org/10.5936/csbj.201304004>.
140. Chiang, M.-C.; Chen, H.-M.; Lee, Y.-H.; Chang, H.-H.; Wu, Y.-C.; Soong, B.-W.; Chen, C.-M.; Wu, Y.-R.; Liu, C.-S.; Niu, D.-M.; et al. Dysregulation of C/EBP $\alpha$  by mutant Huntingtin causes the urea cycle deficiency in Huntington's disease. *Hum. Mol. Genet.* **2007**, *16*, 483–498, <https://doi.org/10.1093/hmg/ddl481>.
141. Jeong, H.; Moye, L.S.; Southey, B.R.; Hernandez, A.G.; Dripps, I.; Romanova, E.V.; Rubakhin, S.S.; Sweedler, J.V.; Pradhan, A.A.; Rodriguez-Zas, S.L. Gene Network Dysregulation in the Trigeminal Ganglia and Nucleus Accumbens of a Model of Chronic Migraine-Associated Hyperalgesia. *Front. Syst. Neurosci.* **2018**, *12*, <https://doi.org/10.3389/fnsys.2018.00063>.
142. Miller, J.R.C.; Lo, K.K.; Andre, R.; Moss, D.J.H.; Träger, U.; Stone, T.C.; Jones, L.; Holmans, P.; Plagnol, V.; Tabrizi, S.J. RNA-Seq of Huntington's disease patient myeloid cells reveals innate transcriptional dysregulation associated with proinflammatory pathway activation. *Hum. Mol. Genet.* **2016**, *25*, 2893–2904, <https://doi.org/10.1093/hmg/ddw142>.
143. Li, J.; Khankan, R.R.; Caneda, C.; Godoy, M.I.; Haney, M.S.; Krawczyk, M.C.; Bassik, M.C.; Sloan, S.A.; Zhang, Y. Astrocyte-to-astrocyte contact and a positive feedback loop of growth factor signaling regulate astrocyte maturation. *Glia* **2019**, *67*, 1571–1597, <https://doi.org/10.1002/glia.23630>.
144. Agostoni, E.; Michelazzi, S.; Maurutto, M.; Carnemolla, A.; Ciani, Y.; Vatta, P.; Roncaglia, P.; Zucchelli, S.; Leanza, G.; Mantovani, F.; et al. Effects of Pin1 Loss in HdhQ111 Knock-in Mice. *Front. Cell. Neurosci.* **2016**, *10*, 110–110, <https://doi.org/10.3389/fncel.2016.00110>.
145. Wang, F.; Yang, Y.; Lin, X.; Wang, J.-Q.; Wu, Y.-S.; Xie, W.; Wang, D.; Zhu, S.; Liao, Y.-Q.; Sun, Q.; et al. Genome-wide loss of 5-hmC is a novel epigenetic feature of Huntington's disease. *Hum. Mol. Genet.* **2013**, *22*, 3641–3653, <https://doi.org/10.1093/hmg/ddt214>.
146. Salvalaio, M.; D'Avanzo, F.; Rigon, L.; Zanetti, A.; D'Angelo, M.; Valle, G.; Scarpa, M.; Tomanin, R. Brain RNA-Seq Profiling of the Mucopolysaccharidosis Type II Mouse Model. *Int. J. Mol. Sci.* **2017**, *18*, 1072, <https://doi.org/10.3390/ijms18051072>.
147. Yamanaka, T.; Wong, H.K.; Tosaki, A.; Bauer, P.O.; Wada, K.; Kurosawa, M.; Shimogori, T.; Hattori, N.; Nukina, N. Large-Scale RNA Interference Screening in Mammalian Cells Identifies Novel Regulators of Mutant Huntingtin Aggregation. *PLoS ONE* **2014**, *9*, e93891, <https://doi.org/10.1371/journal.pone.0093891>.
148. Strand, A.D.; Aragaki, A.K.; Shaw, D.; Bird, T.; Holton, J.; Turner, C.; Tapscott, S.J.; Tabrizi, S.J.; Schapira, A.H.; Kooperberg, C.; et al. Gene expression in Huntington's disease skeletal muscle: A potential biomarker. *Hum. Mol. Genet.* **2005**, *14*, 1863–1876, <https://doi.org/10.1093/hmg/ddi192>.
149. Li, M.D.; Burns, T.C.; A Morgan, A.; Khatri, P. Integrated multi-cohort transcriptional meta-analysis of neurodegenerative diseases. *Acta Neuropathol. Commun.* **2014**, *2*, 1–23, <https://doi.org/10.1186/s40478-014-0093-y>.
150. Moradifard, S.; Hoseinbeyki, M.; Ganji, S.M.; Minuchehr, Z. Analysis of microRNA and Gene Expression Profiles in Alzheimer's Disease: A Meta-Analysis Approach. *Sci. Rep.* **2018**, *8*, 1–17, <https://doi.org/10.1038/s41598-018-20959-0>.
151. The HD iPSC Consortium Induced Pluripotent Stem Cells from Patients with Huntington's Disease Show CAG-Repeat-Expansion-Associated Phenotypes. *Cell Stem Cell* **2012**, *11*, 264–278, <https://doi.org/10.1016/j.stem.2012.04.027>.
152. Loera-Valencia, R.; Piras, A.; Ismail, M.A.M.; Manchanda, S.; Eyjolfssdottir, H.; Saido, T.C.; Johansson, J.; Eriksdotter, M.; Winblad, B.; Nilsson, P. Targeting Alzheimer's disease with gene and cell therapies. *J. Intern. Med.* **2018**, *284*, 2–36, <https://doi.org/10.1111/joim.12759>.
153. Tao, B.; Ling, Y.; Zhang, Y.; Li, S.; Zhou, P.; Wang, X.; Li, B.; Jun, Z.; Zhang, W.; Xu, C.; et al. CA 10 and CA 11 negatively regulate neuronal activity-dependent growth of gliomas. *Mol. Oncol.* **2019**, *13*, 1018–1032, <https://doi.org/10.1002/1878-0261.12445>.
154. Krüger, R.; Schöls, L.; Müller, T.; Kuhn, W.; Woitalla, D.; Przuntek, H.; Epplen, J.T.; Riess, O. Evaluation of the  $\gamma$ -synuclein gene in German Parkinson's disease patients. *Neurosci. Lett.* **2001**, *310*, 191–193, [https://doi.org/10.1016/s0304-3940\(01\)02127-9](https://doi.org/10.1016/s0304-3940(01)02127-9).
155. Mahinrad, S.; Bulk, M.; van der Velpen, I.; Mahfouz, A.; van Roon-Mom, W.; Fedarko, N.; Yasar, S.; Sabayan, B.; van Heemst, D.; van der Weerd, L. Natriuretic Peptides in Post-mortem Brain Tissue and Cerebrospinal Fluid of Non-demented Humans and Alzheimer's Disease Patients. *Front. Neurosci.* **2018**, *12*, 864, <https://doi.org/10.3389/fnins.2018.00864>.
156. Scholl-Bürgi, S.; Sigl, S.B.; Häberle, J.; Haberlandt, E.; Rostásy, K.; Ertl, C.; Eichinger-Öttl, U.; Heinz-Erian, P.; Karall, D. Amino acids in CSF and plasma in hyperammonaemic coma due to arginase1 deficiency. *J. Inherit. Metab. Dis.* **2008**, *31*, 323–328, <https://doi.org/10.1007/s10545-008-0903-0>.
157. Fridén, M.; Winiwarter, S.; Jerndal, G.; Bengtsson, O.; Wan, H.; Bredberg, U.; Hammarlund-Udenaes, M.; Antonsson, M. Structure-Brain Exposure Relationships in Rat and Human Using a Novel Data Set of Unbound Drug Concentrations in Brain Interstitial and Cerebrospinal Fluids. *J. Med. Chem.* **2009**, *52*, 6233–6243, <https://doi.org/10.1021/jm901036q>.

158. Pellegrini, L.; Bonfio, C.; Chadwick, J.; Begum, F.; Skehel, M.; Lancaster, M.A. Human CNS barrier-forming organoids with cerebrospinal fluid production. *Science* **2020**, *369*, <https://doi.org/10.1126/science.aaz5626>.
159. Elmenhorst, D.; Meyer, P.T.; Matusch, A.; Winz, O.H.; Bauer, A. Caffeine Occupancy of Human Cerebral A<sub>1</sub> Adenosine Receptors: In Vivo Quantification with <sup>18</sup>F-CPFPX and PET. *J. Nucl. Med.* **2012**, *53*, 1723–1729, <https://doi.org/10.2967/jnumed.112.105114>.
160. Johannessen, S.; Gerna, M.; Bakke, J.; Strandjord, R.; Morselli, P. CSF CONCENTRATIONS AND SERUM PROTEIN BINDING OF CARBAMAZEPINE AND CARBAMAZEPINE-10, 11-EPOXIDE IN EPILEPTIC PATIENTS. *Br. J. Clin. Pharmacol.* **1976**, *3*, 575–582, <https://doi.org/10.1111/j.1365-2125.1976.tb04878.x>.
161. Paulzen, M.; Lammertz, S.E.; Gründer, G.; Veselinovic, T.; Hiemke, C.; Tauber, S.C. Measuring citalopram in blood and central nervous system. *Int. Clin. Psychopharmacol.* **2016**, *31*, 119–126, <https://doi.org/10.1097/yic.0000000000000114>.
162. Allonen, H.; Andersson, K.-E.; Iisalo, E.; Kanto, J.; Strömblad, L.; Wettrell, G. Passage of Digoxin into Cerebrospinal Fluid in Man. *Acta Pharmacol. et Toxicol.* **2009**, *41*, 193–202, <https://doi.org/10.1111/j.1600-0773.1977.tb02139.x>.
163. Pardridge, W.M. CSF, blood-brain barrier, and brain drug delivery. *Expert Opin. Drug Deliv.* **2016**, *13*, 963–975, <https://doi.org/10.1517/17425247.2016.1171315>.
164. González-Sánchez, M.; Jiménez, J.; Narváez, A.; Antequera, D.; Llamas-Velasco, S.; Martín, A.H.-S.; Arjona, J.A.M.; De Munain, A.L.; Bisa, A.L.; Marco, M.-P.; et al. Kynurenic Acid Levels are Increased in the CSF of Alzheimer's Disease Patients. *Biomolecules* **2020**, *10*, 571, doi:10.3390/biom10040571.
165. Vassal, G.; Valteau, D.; Bonnay, M.; Patte, C.; Aubier, F.; Lemerle, J. Cerebrospinal Fluid and Plasma Methotrexate Levels Following High-Dose Regimen Given as a 3-Hour Intravenous Infusion in Children with Nonhodgkin's Lymphoma. *Pediatr. Hematol. Oncol.* **1990**, *7*, 71–77, <https://doi.org/10.3109/08880019009034320>.
166. Ogutu, B.R.; Newton, C.; Muchohi, S.N.; Otieno, G.O.; Edwards, G.; Watkins, W.M.; Kokwaro, G.O. Pharmacokinetics and clinical effects of phenytoin and fosphenytoin in children with severe malaria and status epilepticus. *Br. J. Clin. Pharmacol.* **2003**, *56*, 112–119, <https://doi.org/10.1046/j.1365-2125.2003.01829.x>.
